# Supplementary material
Source: ML conference proceedings conference paper supplement (https://openreview.net/forum?id=sy2Pp7bXxl)

Input

Output

Input

Output

Input

Output

Extreme expression

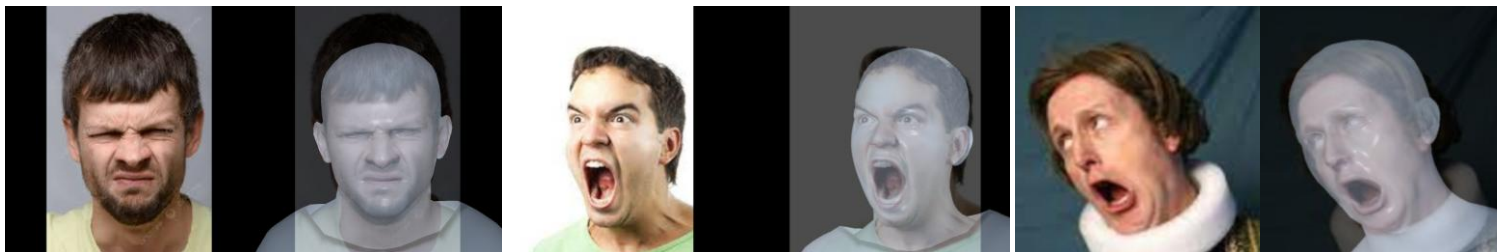

Extreme light

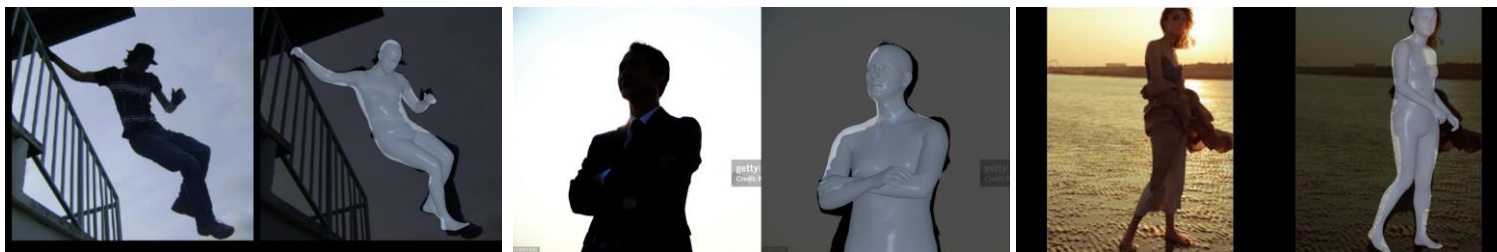

Motion blur

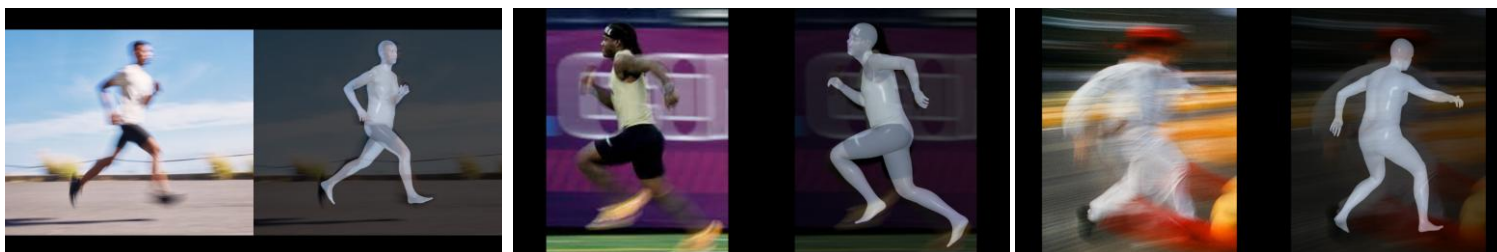

Occlusion

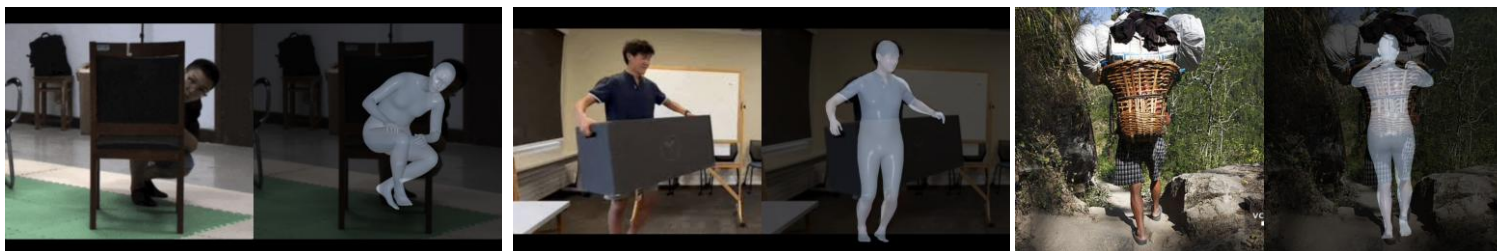

Side view

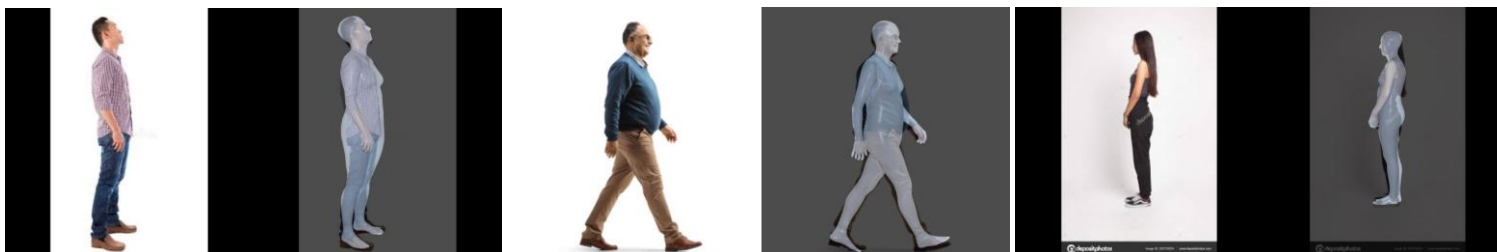

Supplement: supplementary_material [file Extreme_case.pdf › PEAR/static/videos/Extreme_case.pdf]
